# Supplementary material for: Autologous T-Cell-Free Antigen Presentation System Unveils hCMV-Specific NK Cell Response
Source: MDPI journal article supplement (doi:10.3390/cells13060530), 2024-03-17
Supplement: s1 [file s1]

## *Supplementary Material*

### Supplementary Figures

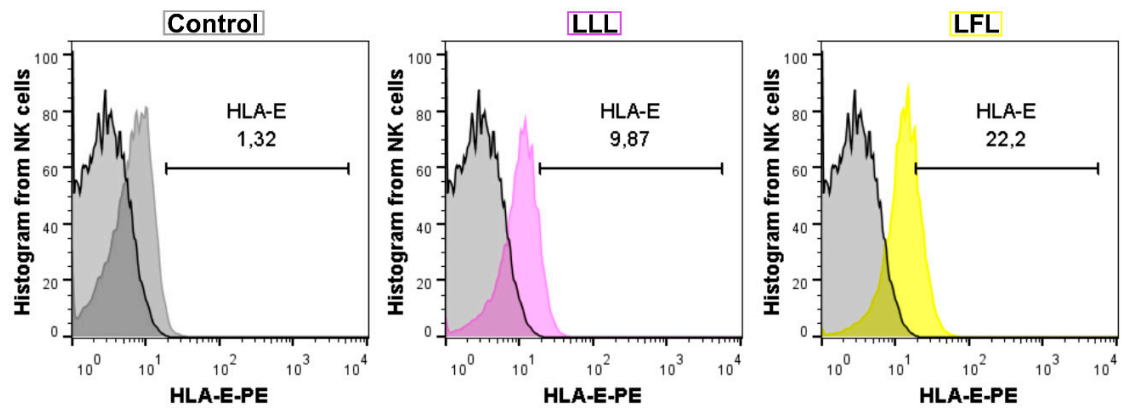

**Supplementary Figure S1.** Representative cytometric data of HLA-E surface expression without and after stimulation with LLL/LFL in NK cells.

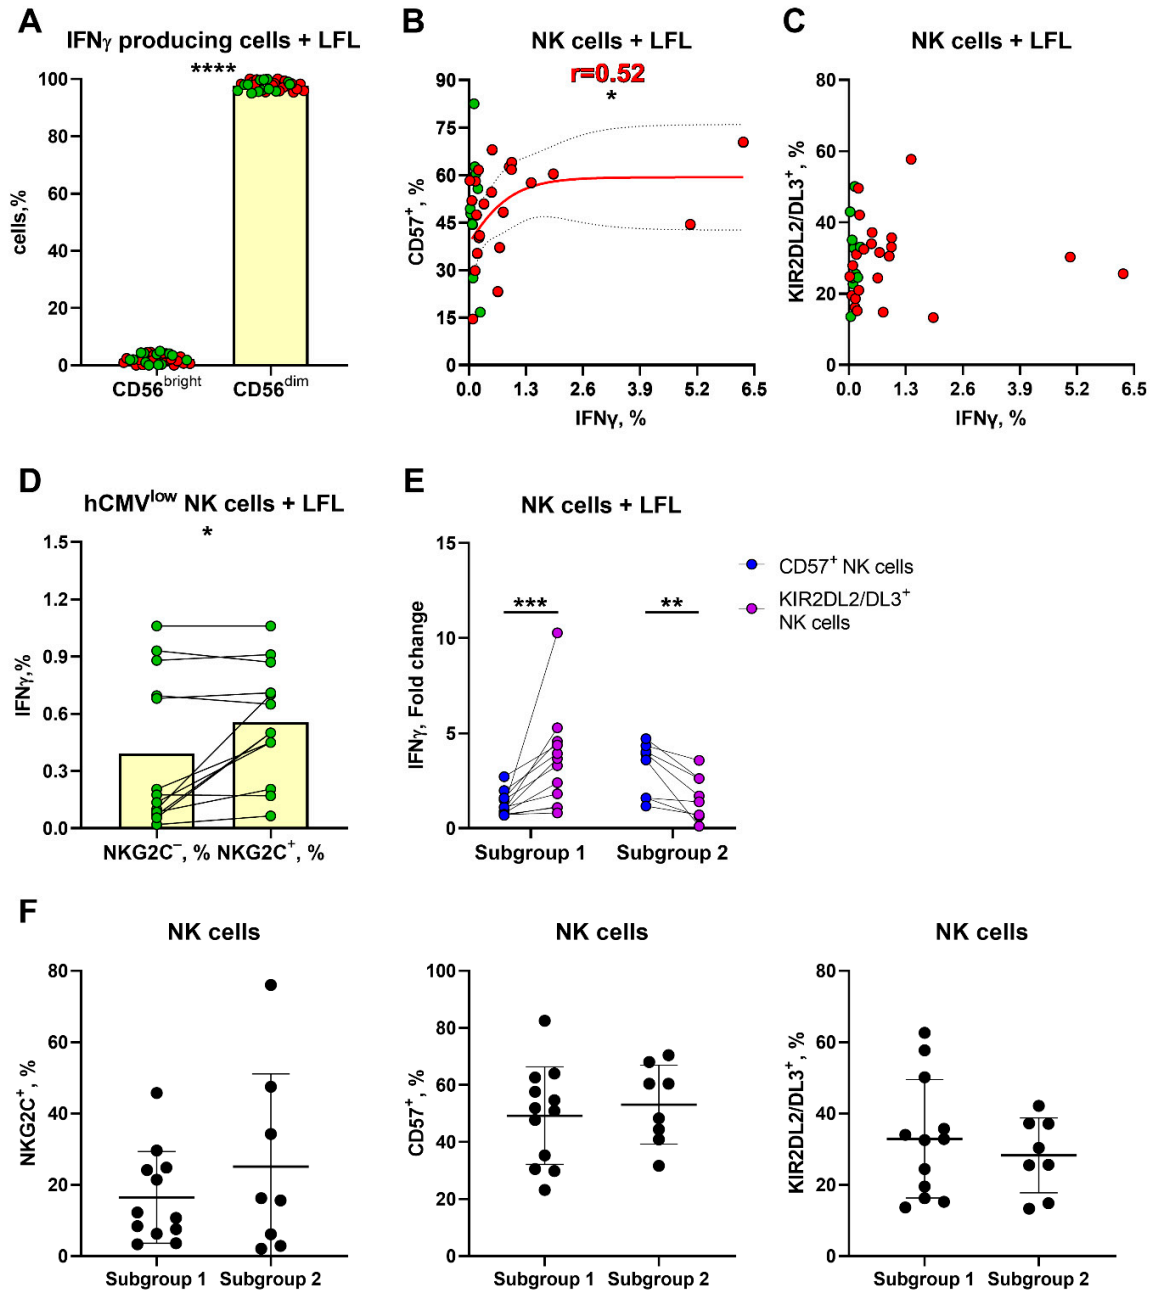

**Supplementary Figure S2.** IFN $\gamma$  production by NK cells upon stimulation with the LFL peptide. **(A)** Comparison of the proportions of CD56<sup>bright</sup> and CD56<sup>dim</sup> NK cells producing IFN $\gamma$  ( $n=34$ ). **(B)** Spearman correlation analysis of CD57 expression and IFN $\gamma$  production by NK cells stimulated with LFL in all studied groups, presented using a nonlinear regression model ( $n=34$ ). **(C)** Spearman correlation analysis of KIR2DL2/DL3 expression and IFN $\gamma$  production by NK cells stimulated with LFL in all studied groups ( $n=34$ ). **(D)** Comparison of IFN $\gamma$  production in NKG2C<sup>+</sup> and NKG2C<sup>-</sup> NK cells in samples stimulated with LFL in the hCMV<sup>low</sup> group ( $n=13$ ). **(E)** Fold change of IFN $\gamma$  production by CD57<sup>+</sup> and KIR2DDL2DL3<sup>+</sup> NK cells, separated into two subgroups (subgroup 1 –

$n=12$ , subgroup 2 –  $n=8$  of hCMV<sup>high</sup> donors). (F) The percentage of NKG2C<sup>+</sup>, CD57<sup>+</sup>, KIR2DL2/DL3<sup>+</sup> NK cells in two subgroups, identified in (C) (subgroup 1 –  $n=12$ , subgroup 2 –  $n=8$  of hCMV<sup>high</sup> donors). The color of the symbols corresponds to the groups, where green is hCMV<sup>low</sup>, red is hCMV<sup>high</sup>. NK cells were stimulated with the LFL peptide (VMAPRTLFL). Data are presented as symbols representing the mean of two replicates (B,C), mean values with lines connecting symbols for each donor (D,E), mean $\pm$ SD (A,F). The paired Wilcoxon test was used to analyze the data (D,E), and the T test was used for unpaired data (A,F). \* $p<0.05$ , \*\* $p<0.01$ , \*\*\* $p<0.001$ .

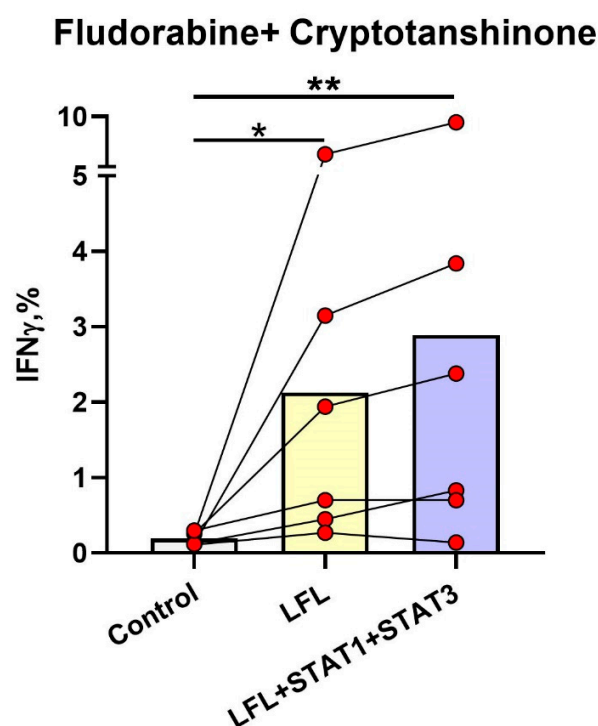

**Supplementary Figure S3.** Effect of simultaneous addition of STAT1 (Fludorabine) and STAT3 (Cryptotanshinone) inhibitors on the level of IFN $\gamma$  production in NK cells of hCMV<sup>high</sup> donors ( $n=6$ ). Data are presented as mean values with lines connecting symbols for each donor. Each symbol represents the mean of two replicates. The paired Friedman statistical test was used to analyze the data. \* $p<0.05$ , \*\* $p<0.01$ .

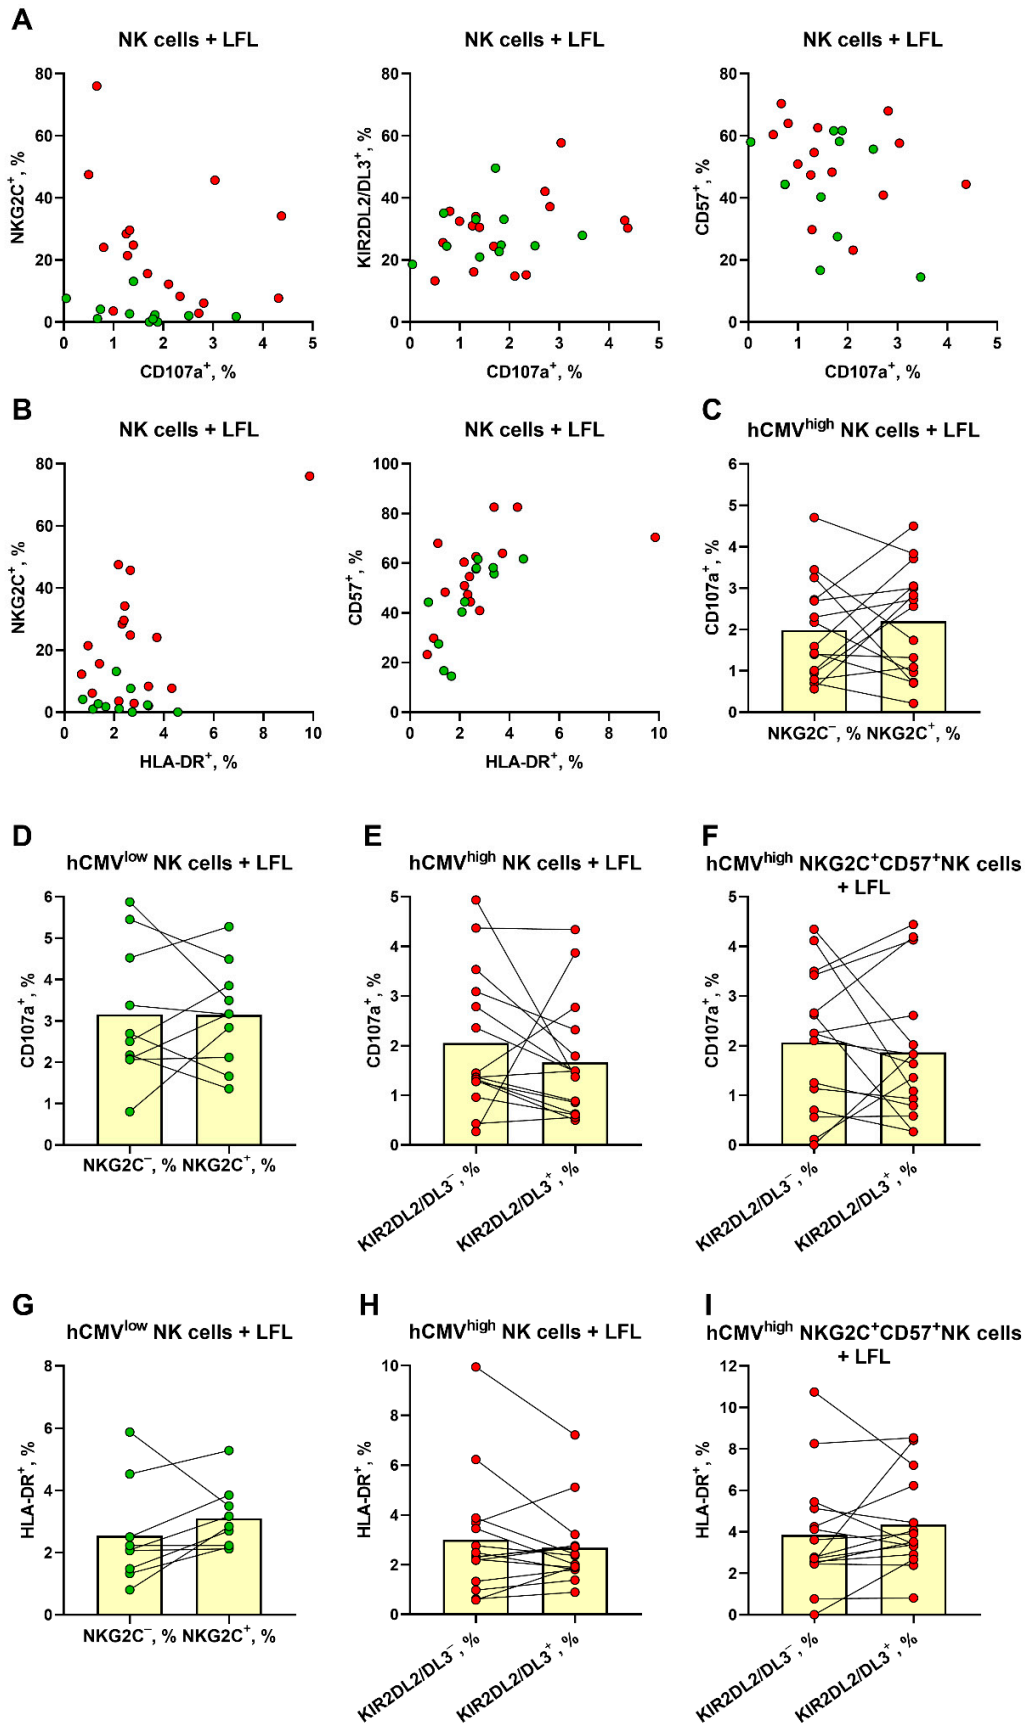

**Supplementary Figure S4.** Degranulation and activation of NK cells upon stimulation with the LFL peptide. **(A)** Spearman correlation analysis of NKG2C, CD57, KIR2DL2/DL3 expression and level of CD107a expression by NK cells stimulated with LFL in all studied groups ( $n=27$ ). **(B)** Spearman correlation analysis of NKG2C, CD57 expression and level of HLA-DR expression by NK cells stimulated with LFL in all studied groups ( $n=27$ ). **(C)** Comparison of CD107a expression by NKG2C<sup>+</sup> and NKG2C<sup>-</sup> NK cells in samples stimulated with LFL in hCMV<sup>high</sup> group ( $n=16$ ). **(D)** Comparison of CD107a expression by NKG2C<sup>+</sup> and NKG2C<sup>-</sup> NK cells in samples stimulated with LFL in hCMV<sup>low</sup> group ( $n=11$ ). **(E)** Comparison of CD107a expression by KIR2DL2/DL3<sup>+</sup> and KIR2DL2/DL3<sup>-</sup> NK cells in samples stimulated with LFL in hCMV<sup>high</sup> group ( $n=16$ ). **(F)** Comparison of CD107a expression by KIR2DL2/DL3<sup>+</sup> and KIR2DL2/DL3<sup>-</sup> NKG2C<sup>+</sup>CD57<sup>+</sup>NK cells in samples stimulated with LFL in hCMV<sup>high</sup> group ( $n=16$ ). **(G)** Comparison of HLA-DR expression by NKG2C<sup>+</sup> and NKG2C<sup>-</sup> NK cells in samples stimulated with LFL in hCMV<sup>low</sup> group ( $n=11$ ). **(H)** Comparison of HLA-DR expression by KIR2DL2/DL3<sup>+</sup> and KIR2DL2/DL3<sup>-</sup> NK cells in samples with stimulated LFL in hCMV<sup>high</sup> group ( $n=16$ ). **(I)** Comparison of HLA-DR expression by KIR2DL2/DL3<sup>+</sup> and KIR2DL2/DL3<sup>-</sup> NKG2C<sup>+</sup>CD57<sup>+</sup>NK cells in samples stimulated with LFL in hCMV<sup>high</sup> group ( $n=16$ ). The color of the symbols corresponds to the groups, wherein green – hCMV<sup>low</sup>, red – hCMV<sup>high</sup>. The color of the boxes corresponds to stimulation conditions, where gray is no stimulation and light yellow – stimulation with the LFL peptide (VMAPRTLFL). Data are presented as mean values with lines connecting symbols for each donor. Each symbol represents the mean of two replicates.

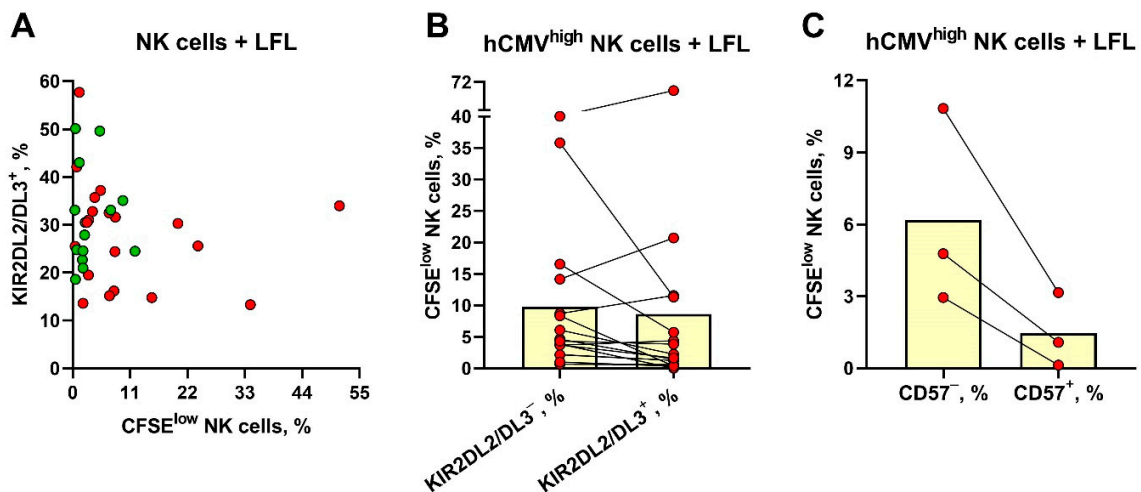

**Supplementary Figure S5.** Proliferative potential of NK cells after 7 days of incubation with the LFL peptide, and following characterization of CFSE<sup>low</sup> NK cells. **(A)** Spearman correlation analysis of KIR2DL2/DL3 expression and the percentage of CFSE<sup>low</sup> NK cells stimulated with LFL in all studied groups ( $n=34$ ). **(B)** Comparison of the percentage of CFSE<sup>low</sup> NK cells in KIR2DL2/DL3<sup>+</sup> and KIR2DL2/DL3<sup>-</sup> NK cells in samples stimulated with LFL in hCMV<sup>high</sup> group ( $n=16$ ). **(C)** Comparison of the percentage of CFSE<sup>low</sup> NK cells in CD57<sup>+</sup> and CD57<sup>-</sup> NK cells in samples stimulated with LFL in hCMV<sup>high</sup> group ( $n=3$ ). The color of the symbols corresponds to the groups, where green is hCMV<sup>low</sup>, red is hCMV<sup>high</sup>. The color of the boxes corresponds to stimulation conditions, wherein gray – no stimulation and light yellow – stimulation with the LFL peptide (VMAPRTLFL). Data are presented

as mean values with lines connecting symbols for each donor. Each symbol represents the mean of two replicates.

## LFLvsLLL

EnhancedVolcano

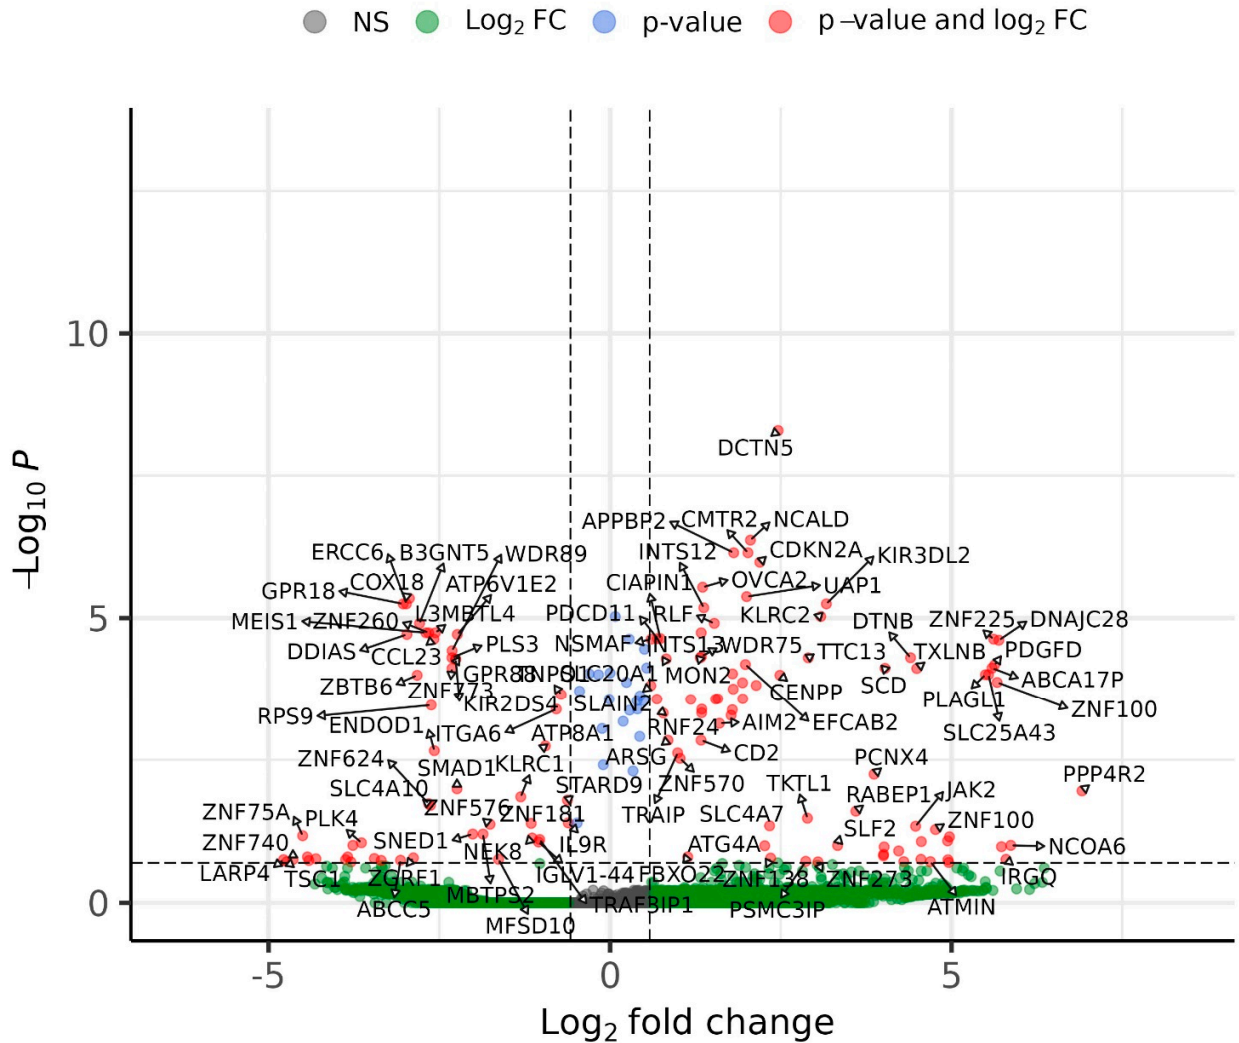

total = 38241 variables

**Supplementary Figure S6.** Volcano plot comparing LFL-stimulated with LLL-stimulated CFSE<sup>low</sup> NK cells significant 96 out of 130 up-regulated and down-regulated genes are labeled.
